# Supplementary material for: A New Technique for Impervious Surface Mapping and Its Spatio-Temporal Changes from Landsat and Sentinel-2 Images
Source: MDPI journal article supplement (doi:10.3390/su15107947), 2023-05-12
Supplement: s1 [file s1]

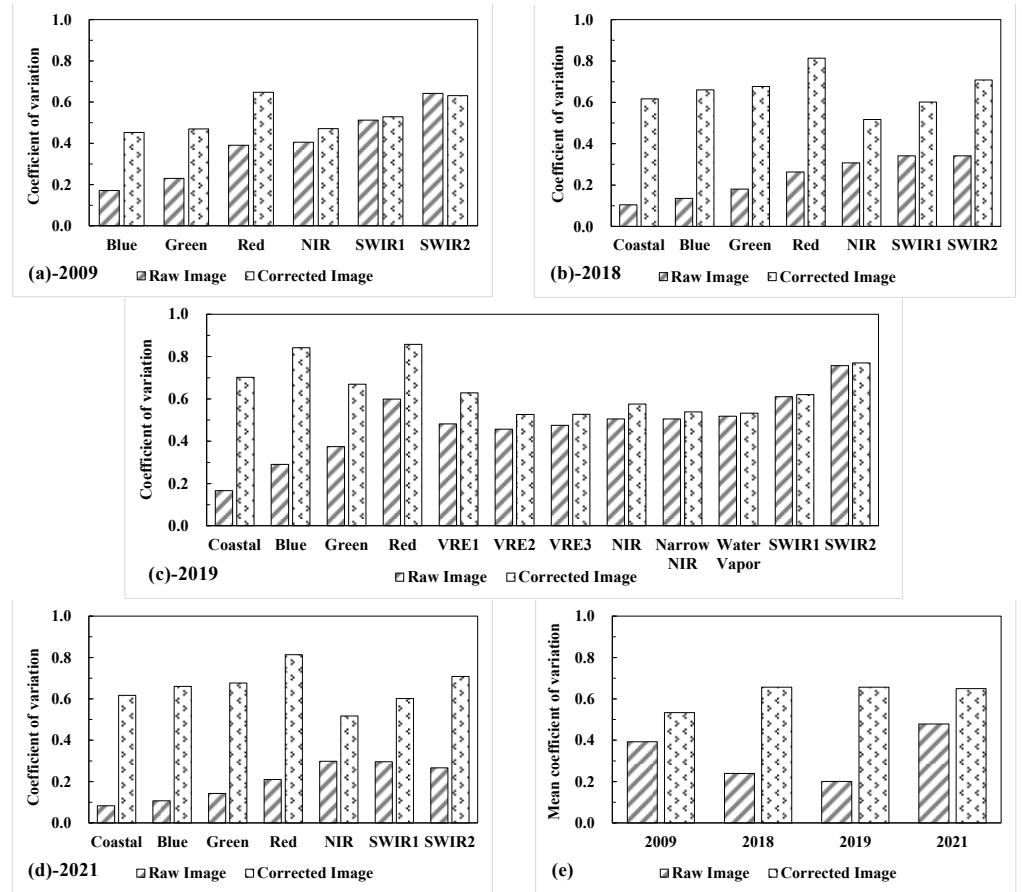

**Figure S1.** Comparisons of coefficient of variation (CV) for the raw images and their corrected products by atmospheric correction methods from 2009 to 2021.
